# Supplementary material for: Effect of Drought and Heavy Metal Contamination on Growth and Photosynthesis of Silver Birch Trees Growing on Post-Industrial Heaps
Source: MDPI journal article supplement (doi:10.3390/cells11010053), 2021-12-24
Supplement: s1 [file s1]

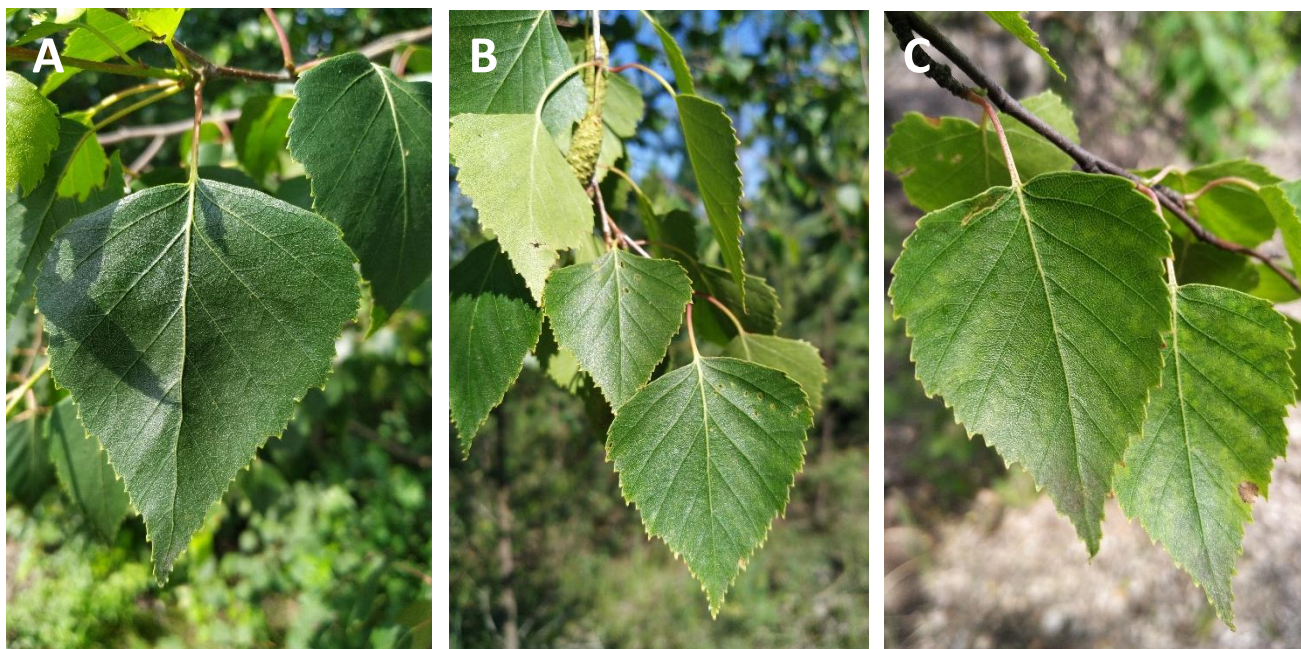

**Figure S1.** Photographs of typical birch leaves from reference site in Tychy (A), post-coal mine heap in Katowice (B) and post-smelter heap in Piekary Śląskie (C).

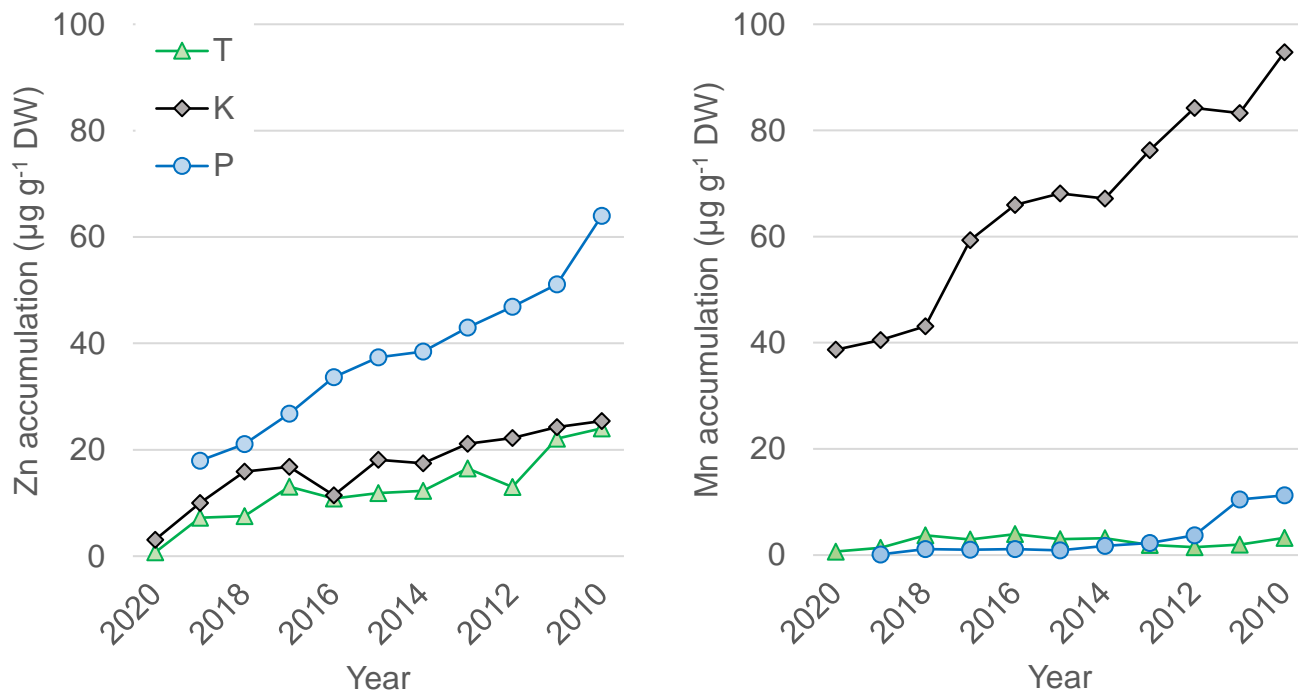

**Figure S2.** The accumulation of zinc or manganese in birch wood from a particular year of growth. Data are means ( $n = 10$ ). Abbreviations: T – reference site in Tychy; K – post-coal mine heap in Katowice; P – post-smelter heap in Piekary Śląskie.

**Table S1.** Site and soil characteristics.

| <i>Site characteristics</i>                               |               |                              |                            |
|-----------------------------------------------------------|---------------|------------------------------|----------------------------|
|                                                           | T             | K                            | P                          |
| Location                                                  | Tychy         | Katowice-Murcki              | Piekary Śląskie            |
| Altitude (m AMSL)                                         | 259           | 321                          | 287                        |
| Temperature (°C) <sup>a</sup>                             | 9.0           | 9.1                          | 9.1                        |
| Precipitation (mm) <sup>a</sup>                           | 817           | 807                          | 910                        |
| Latitude                                                  | 50.1043268    | 50.1895495                   | 50.3681323                 |
| Longitude                                                 | 18.9644241    | 19.0322035                   | 18.9689818                 |
| Habitat                                                   | suburban area | post-coal mine<br>spoil heap | post-smelter spoil<br>heap |
| <i>Soil characteristics</i>                               |               |                              |                            |
| pH (H <sub>2</sub> O)                                     | 6.09 ± 0.15 b | 3.68 ± 0.06 c                | 7.33 ± 0.08 a              |
| EC (µS cm <sup>-1</sup> )                                 | 160 ± 28 b    | 113 ± 10 b                   | 800 ± 91 a                 |
| Total element content in the soil (µg g <sup>-1</sup> DW) |               |                              |                            |
| Ca                                                        | 2140 ± 440 b  | 160 ± 40 c                   | 81070 ± 3420 a             |
| Cd                                                        | 0.52 ± 0.07 b | BDL                          | 212.51 ± 34.90 a           |
| Cu                                                        | 7.2 ± 2.0 c   | 28.3 ± 0.9 b                 | 961.5 ± 131.8 a            |
| Fe                                                        | 5160 ± 300 b  | 6160 ± 150 a                 | 6890 ± 410 a               |
| K                                                         | 2340 ± 570 b  | 9560 ± 370 a                 | 670 ± 110 c                |
| Mg                                                        | 1070 ± 210 b  | 910 ± 50 b                   | 16920 ± 1920 a             |
| Mn                                                        | 350 ± 40 b    | 160 ± 10 c                   | 3900 ± 190 a               |
| Zn                                                        | 25.0 ± 3.0 c  | 138.7 ± 26.8 b               | 25545.1 ± 4110.0 a         |

<sup>a</sup> – data from climate-data.org

Abbreviations: T – reference site in Tychy; K – post-coal mine heap in Katowice; P – post-smelter heap in Piekary Śląskie.

**Table S2.** Element accumulation in bark and wood of studied birch populations.

|                                                         | T                  | K                  | P                  |
|---------------------------------------------------------|--------------------|--------------------|--------------------|
| Element accumulation in bark ( $\mu\text{g g}^{-1}$ DW) |                    |                    |                    |
| Ca                                                      | 4915 $\pm$ 52 b    | 563 $\pm$ 63 c     | 7542 $\pm$ 420 a   |
| Cd                                                      | BDL                | BDL                | 3.02 $\pm$ 0.36 a  |
| Cu                                                      | BDL                | BDL                | BDL                |
| Fe                                                      | 74.29 $\pm$ 0.91 a | 24.28 $\pm$ 1.12 b | 26.92 $\pm$ 2.48 b |
| K                                                       | 462 $\pm$ 18 a     | 46 $\pm$ 4 c       | 265 $\pm$ 12 b     |
| Mg                                                      | 166 $\pm$ 13 b     | 148 $\pm$ 15 b     | 696 $\pm$ 27 a     |
| Mn                                                      | 38.8 $\pm$ 2.4 b   | 257.5 $\pm$ 14.4 a | 15.9 $\pm$ 1.5 c   |
| Zn                                                      | 113.5 $\pm$ 5.5 b  | 92.3 $\pm$ 6.2 b   | 230.5 $\pm$ 12.4 a |
| Element accumulation in wood ( $\mu\text{g g}^{-1}$ DW) |                    |                    |                    |
| Ca                                                      | 382 $\pm$ 40 b     | 188 $\pm$ 35 c     | 923 $\pm$ 91 a     |
| Cd                                                      | BDL                | BDL                | 4.44 $\pm$ 0.57 a  |
| Cu                                                      | BDL                | BDL                | BDL                |
| Fe                                                      | 50.28 $\pm$ 4.98 a | 25.26 $\pm$ 3.39 b | 14.62 $\pm$ 5.52 b |
| K                                                       | BDL                | BDL                | BDL                |
| Mg                                                      | 100 $\pm$ 18 b     | 129 $\pm$ 9 b      | 335 $\pm$ 35 a     |
| Mn                                                      | 3.7 $\pm$ 0.5 b    | 96.0 $\pm$ 2.8 a   | 1.0 $\pm$ 0.2 b    |
| Zn                                                      | 12.0 $\pm$ 0.8 c   | 25.5 $\pm$ 1.9 b   | 45.6 $\pm$ 3.1 a   |

Abbreviations: T – reference site in Tychy; K – post-coal mine heap in Katowice; P – post-smelter heap in Piekary Śląskie. BDL – below detection limit. Data are means  $\pm$  SE (n = 10).

**Table S3.** The correlation matrix of variables used in the PCA.

|                  | LEF          | NPQ <sub>T</sub> | Φ <sub>II</sub> | Φ <sub>NO</sub> | Φ <sub>NPQ</sub> | PS1AC        | Thick        | E            | A            | ci           | Chl          | Flav         | Anth         | Ca           | Mg           | Mn           | Zn           | TRW         |
|------------------|--------------|------------------|-----------------|-----------------|------------------|--------------|--------------|--------------|--------------|--------------|--------------|--------------|--------------|--------------|--------------|--------------|--------------|-------------|
| LEF              | <b>1.00</b>  | -0.20            | 0.11            | 0.18            | -0.28            | 0.17         | -0.58        | 0.61         | 0.32         | 0.04         | 0.31         | -0.59        | -0.46        | 0.15         | -0.42        | -0.31        | -0.07        | -0.12       |
| NPQ <sub>T</sub> | <b>-0.20</b> | <b>1.00</b>      | -0.68           | -0.61           | 0.94             | -0.14        | 0.45         | -0.06        | -0.11        | 0.07         | -0.27        | 0.44         | 0.31         | -0.31        | -0.05        | 0.59         | -0.25        | 0.52        |
| Φ <sub>II</sub>  | <b>0.11</b>  | <b>-0.68</b>     | <b>1.00</b>     | -0.08           | -0.79            | 0.37         | -0.56        | 0.19         | 0.36         | -0.24        | 0.31         | -0.30        | -0.39        | 0.28         | -0.10        | -0.44        | 0.09         | -0.28       |
| Φ <sub>NO</sub>  | <b>0.18</b>  | <b>-0.61</b>     | <b>-0.08</b>    | <b>1.00</b>     | -0.47            | -0.22        | -0.05        | -0.11        | -0.19        | 0.10         | 0.01         | -0.21        | 0.01         | 0.17         | 0.16         | -0.26        | 0.22         | -0.30       |
| Φ <sub>NPQ</sub> | <b>-0.28</b> | <b>0.94</b>      | <b>-0.79</b>    | <b>-0.47</b>    | <b>1.00</b>      | -0.20        | 0.60         | -0.19        | -0.27        | 0.19         | -0.36        | 0.53         | 0.41         | -0.37        | 0.07         | 0.62         | -0.20        | 0.48        |
| PS1 AC           | <b>0.17</b>  | <b>-0.14</b>     | <b>0.37</b>     | <b>-0.22</b>    | <b>-0.20</b>     | <b>1.00</b>  | -0.31        | 0.35         | 0.44         | -0.23        | 0.42         | -0.36        | -0.51        | -0.13        | -0.25        | -0.14        | -0.14        | 0.03        |
| Thick            | <b>-0.58</b> | <b>0.45</b>      | <b>-0.56</b>    | <b>-0.05</b>    | <b>0.60</b>      | <b>-0.31</b> | <b>1.00</b>  | -0.52        | -0.48        | 0.21         | -0.40        | 0.71         | 0.57         | -0.28        | 0.27         | 0.68         | -0.06        | 0.43        |
| E                | <b>0.61</b>  | <b>-0.06</b>     | <b>0.19</b>     | <b>-0.11</b>    | <b>-0.19</b>     | <b>0.35</b>  | <b>-0.52</b> | <b>1.00</b>  | 0.85         | -0.42        | 0.49         | -0.66        | -0.61        | -0.06        | -0.64        | -0.07        | -0.40        | 0.24        |
| A                | <b>0.32</b>  | <b>-0.11</b>     | <b>0.36</b>     | <b>-0.19</b>    | <b>-0.27</b>     | <b>0.44</b>  | <b>-0.48</b> | <b>0.85</b>  | <b>1.00</b>  | -0.66        | 0.58         | -0.55        | -0.63        | -0.02        | -0.59        | -0.07        | -0.43        | 0.25        |
| ci               | <b>0.04</b>  | <b>0.07</b>      | <b>-0.24</b>    | <b>0.10</b>     | <b>0.19</b>      | <b>-0.23</b> | <b>0.21</b>  | <b>-0.42</b> | <b>-0.66</b> | <b>1.00</b>  | -0.58        | 0.42         | 0.60         | 0.08         | 0.69         | -0.12        | 0.44         | -0.43       |
| Chl              | <b>0.31</b>  | <b>-0.27</b>     | <b>0.31</b>     | <b>0.01</b>     | <b>-0.36</b>     | <b>0.42</b>  | <b>-0.40</b> | <b>0.49</b>  | <b>0.58</b>  | <b>-0.58</b> | <b>1.00</b>  | -0.50        | -0.79        | -0.11        | -0.58        | -0.07        | -0.44        | 0.24        |
| Flav             | <b>-0.59</b> | <b>0.44</b>      | <b>-0.30</b>    | <b>-0.21</b>    | <b>0.53</b>      | <b>-0.36</b> | <b>0.71</b>  | <b>-0.66</b> | <b>-0.55</b> | <b>0.42</b>  | <b>-0.50</b> | <b>1.00</b>  | 0.74         | -0.18        | 0.49         | 0.52         | 0.12         | 0.22        |
| Anth             | <b>-0.46</b> | <b>0.31</b>      | <b>-0.39</b>    | <b>0.01</b>     | <b>0.41</b>      | <b>-0.51</b> | <b>0.57</b>  | <b>-0.61</b> | <b>-0.63</b> | <b>0.60</b>  | <b>-0.79</b> | <b>0.74</b>  | <b>1.00</b>  | 0.07         | 0.67         | 0.27         | 0.37         | -0.07       |
| Ca               | <b>0.15</b>  | <b>-0.31</b>     | <b>0.28</b>     | <b>0.17</b>     | <b>-0.37</b>     | <b>-0.13</b> | <b>-0.28</b> | <b>-0.06</b> | <b>-0.02</b> | <b>0.08</b>  | <b>-0.11</b> | <b>-0.18</b> | <b>0.07</b>  | <b>1.00</b>  | 0.32         | -0.51        | 0.77         | -0.58       |
| Mg               | <b>-0.42</b> | <b>-0.05</b>     | <b>-0.10</b>    | <b>0.16</b>     | <b>0.07</b>      | <b>-0.25</b> | <b>0.27</b>  | <b>-0.64</b> | <b>-0.59</b> | <b>0.69</b>  | <b>-0.58</b> | <b>0.49</b>  | <b>0.67</b>  | <b>0.32</b>  | <b>1.00</b>  | -0.12        | 0.58         | -0.47       |
| Mn               | <b>-0.31</b> | <b>0.59</b>      | <b>-0.44</b>    | <b>-0.26</b>    | <b>0.62</b>      | <b>-0.14</b> | <b>0.68</b>  | <b>-0.07</b> | <b>-0.07</b> | <b>-0.12</b> | <b>-0.07</b> | <b>0.52</b>  | <b>0.27</b>  | <b>-0.51</b> | <b>-0.12</b> | <b>1.00</b>  | -0.50        | 0.89        |
| Zn               | <b>-0.07</b> | <b>-0.25</b>     | <b>0.09</b>     | <b>0.22</b>     | <b>-0.20</b>     | <b>-0.14</b> | <b>-0.06</b> | <b>-0.40</b> | <b>-0.43</b> | <b>0.44</b>  | <b>-0.44</b> | <b>0.12</b>  | <b>0.37</b>  | <b>0.77</b>  | <b>0.58</b>  | <b>-0.50</b> | <b>1.00</b>  | -0.75       |
| TRW              | <b>-0.12</b> | <b>0.52</b>      | <b>-0.28</b>    | <b>-0.30</b>    | <b>0.48</b>      | <b>0.03</b>  | <b>0.43</b>  | <b>0.24</b>  | <b>0.25</b>  | <b>-0.43</b> | <b>0.24</b>  | <b>0.22</b>  | <b>-0.07</b> | <b>-0.58</b> | <b>-0.47</b> | <b>0.89</b>  | <b>-0.75</b> | <b>1.00</b> |

Gradient:

|              |
|--------------|
| > 0.75       |
| 0.75 > 0.5   |
| 0.5 > 0.25   |
| 0.25 > -0.25 |
| -0.25 > -0.5 |
| -0.5 > -0.75 |
| -0.75 >      |

Abbreviations: LEF – linear electron flow; NPQ<sub>T</sub> – non-photochemical quenching; Φ<sub>II</sub> – realized steady-state efficiency of PSII; Φ<sub>NO</sub> – non-regulatory energy dissipation; Φ<sub>NPQ</sub> – non-photochemical quenching; PS1 AC – PSI active centres; Thick – leaf thickness; E – transpiration rate; A – photosynthetic rate; ci – intracellular CO<sub>2</sub> content; Chl – chlorophyll content; Flav – flavonol content; Anth – anthocyanin content; Ca – calcium content in leaves; Mg – magnesium content in leaves; Mn – manganese content in leaves; Zn – zinc content in leaves; TRW – tree ring width.
